# Supplementary material for: Seasonal modeling analysis of nitrate formation pathways in Yangtze River Delta region, China
Source: Copernicus journal article supplement (doi:10.5194/acp-22-12629-2022), 2022-09-28
Supplement: Supplementary file 1 [file acp-22-12629-2022-supplement.pdf]

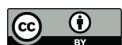

*Supplement of*

## **Seasonal modeling analysis of nitrate formation pathways in Yangtze River Delta region, China**

**Jinjin Sun et al.**

*Correspondence to:* Jianlin Hu ([jianlinhu@nuist.edu.cn](mailto:jianlinhu@nuist.edu.cn)) and Momei Qin ([momei.qin@nuist.edu.cn](mailto:momei.qin@nuist.edu.cn))

The copyright of individual parts of the supplement might differ from the article licence.

# Supplementary Material

## Section I: Introduction

### 1.1. Conceptual framework of the day-night chemical pathways of $\text{NO}_3^-$ .

Nitrate might be produced through the following eight reactions pathways. The chemical equations for these eight production reactions pathways are written as follows:

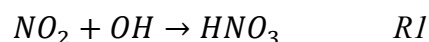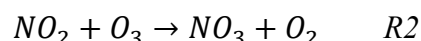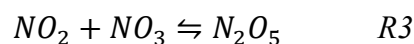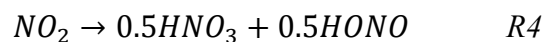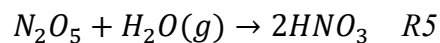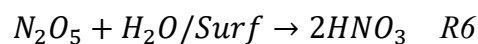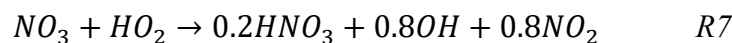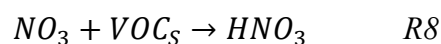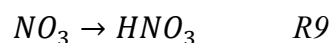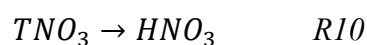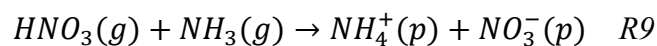

## Section II: Methods

### 2.1. The Optimized WRF model configurations

The major physics schemes used were the New Thompson et al. scheme, the Noah Land Surface Model, the Mellor-Yamada-Janjic planetary boundary layer (PBL) scheme, and the rapid radiative transfer model (RRTM) longwave and shortwave radiation scheme. Detailed WRF model configurations were shown in Table S1 and follow the previous studies by (Hu et al., 2016; Liu et al., 2020; Wang et al., 2021).

Common statistics for WRF-CMAQ model performance included mean bias (MB), normalized mean bias (NMB), normalized mean error (NME), correlation coefficient (R), root mean square error (RMSE) and index of agreement (IOA). The definitions and criteria of statistic metrics were shown in Table S4.

### 2.2 Observation data and Statistics for model performance

Hourly  $\text{O}_3$ ,  $\text{NO}_2$  and  $\text{PM}_{2.5}$  observation data at five environmental monitoring sites

(Shanghai, Nanjing, Hangzhou, Hefei and Changzhou) in the YRD (Fig. 1) were obtained from the China Ministry of Ecology and Environment (MEE). As well as  $\text{NO}_3^-$ , hourly  $\text{PM}_{2.5}$  chemical compositions were collected from the Pudong supersite in Shanghai ( $31^\circ 23' \text{N}$ ,  $121^\circ 54' \text{E}$ ), Chaohui District 5 in Hangzhou ( $30^\circ 29' \text{N}$ ,  $120^\circ 16' \text{E}$ ), Pearl Plaza in Hefei ( $31^\circ 78' \text{N}$ ,  $117^\circ 20' \text{E}$ ) and Changzhou monitoring site ( $31^\circ 76' \text{N}$ ,  $119^\circ 96' \text{E}$ ). The Pudong site ( $31^\circ 23' \text{N}$ ,  $121^\circ 54' \text{E}$ ) is an urban site located near the Century Avenue with heavy traffic, and it is only  $\sim 3$  km from the business center Lujiazui. The instruments at this site were located on the roof of a 20 m tall building.

### 2.3. The calculation of local, direct and indirect transport contributions to the rate of $\text{TNO}_3$ production reactions

Further descriptions of the contribution to  $\text{TNO}_3$  production pathways are provided in the Section S2.3. In WRF-CMAQ modeling, the PA tool was used to calculate the rates of all  $\text{TNO}_3$  production reactions. Modeled rates of a specific reaction in the Base, YRD-zero, Outside-zero and All-zero scenarios (definitions shown in the section 2.2) were marked as  $R_{\text{base}}$ ,  $R_{\text{YRD-zero}}$ ,  $r_{\text{outside-zero}}$ , and  $R_{\text{all-zero}}$ , respectively, and all expressed as mean rates in Shanghai. The rates related to local, direct and indirect transport contributions (denoted as  $R_{\text{Local}}$ ,  $R_{\text{Direct}}$  and  $R_{\text{Indirect}}$ ) can be calculated using the same method as the calculation of pollutant contributions.

$$R_{\text{Local}} = (R_{\text{outside-zero}} - R_{\text{all-zero}}) \quad (1)$$

$$R_{\text{Direct}} = (R_{\text{YRD-zero}} - R_{\text{all-zero}}) \quad (2)$$

$$R_{\text{Indirect}} = (R_{\text{base}} - R_{\text{outside-zero}}) - (R_{\text{YRD-zero}} - R_{\text{all-zero}}) \quad (3)$$

(1)  $R_{\text{Local}}$ : air pollutants directly emitted by sources within target regions and chemically produced from locally emitted precursors.

(2)  $R_{\text{Direct}}$  represents that key precursors emitting from outside regions, including the directly transported and formed through chemical reactions from outside precursors.

(3)  $R_{\text{Indirect}}$  represents that locally emitted  $\text{NO}_x$  reacts with transported  $\text{O}_3$ .

The sum of  $R_{\text{Direct}}$  and  $R_{\text{Indirect}}$  is the contribution of regional transport.

## Section III: Results and discussion

### 3.1 CMAQ model performance

Generally, in Fig. S2, the hourly time series of predicted and observed  $\text{NO}_3^-$  concentrations are well-captured in the winter of Shanghai (NMB = -0.20, MB = -2.09, and R = 0.55), the autumn of Hefei (NMB = -0.07, MB = -0.68, and R = 0.56), and the spring of Hangzhou (NMB = -0.20, MB = -1.71, and R = 0.44).

### 3.2 Regional transport contribution to nitrate

In Fig. S3, the higher predicted  $\text{NO}_3^-$  levels occur in the NCP (Heinan, Heibei and Shangdong provinces) than in the YRD. In winter, spring, summer and autumn, the contribution of background, local, direct and indirect transport to nitrate-related species ( $\text{O}_3$ ,  $\text{HNO}_3$ ,  $\text{PM}_{2.5}$ ,  $\text{NO}_3^-$ ,  $\text{NO}_2$ ,  $\text{NH}_3$ ,  $\text{SO}_4^{2-}$ , and SOC) in Shanghai are shown in Fig. S4. For  $\text{NO}_3^-$ , local emissions dominated regional  $\text{NO}_3^-$  concentration (45–76 %), while regional transport contributed 21–54% to nitrate in all seasons, with indirect transport dominating the regional transport of  $\text{NO}_3^-$ . Higher contributions of indirect nitrate transport occurred in January (31%) and April (34%), suggesting the important role of transported precursor for  $\text{NO}_3^-$  production during the periods. Fig. S4c shows that most of the precursors ( $\text{NO}_2$ : 96–99% and  $\text{NH}_3$ : 98–100%) are dominantly attributed to local contributions. For  $\text{O}_3$ , direct transport contributed 15–32% to regional concentration during the periods (Fig. S4b). Local emissions and indirect transport led to the depletion of  $\text{O}_3$ , which was indicated by the negative contributions in January, April, and October. The negative contributions to  $\text{O}_3$  could be justified in two ways. Firstly, locally emitted  $\text{NO}_2$  could react with transported  $\text{O}_3$  to produce nitrate via the Het  $\text{N}_2\text{O}_5$  pathway at night. Alternatively, the strong titration of transported  $\text{O}_3$  by local  $\text{NO}$  at the surface layer could also lead to the consumption of  $\text{O}_3$ . Contrary to other periods, local emissions contributed 45% to  $\text{O}_3$  production in July, which was later transported to external regions.

In addition,  $\text{HNO}_3$  was dominated by the contributions of local emissions and direct transport. In January, April and October, higher contributions by direct transport to  $\text{HNO}_3$  are observed in Fig. S5a. However, the spatial distributions of  $\text{HNO}_3$  show that higher  $\text{HNO}_3$  concentration are found in July, which was consistent with the stronger chemical production rates. Similar to  $\text{NO}_3^-$ , local emissions in the YRD region were responsible for higher  $\text{HNO}_3$  concentrations. In the same vein, local emissions also dominated the contributions to  $\text{PM}_{2.5}$ , accounting for 61–80% during

the simulation periods. Furthermore, regional transport was also an important contributor to PM<sub>2.5</sub> (8-35%), SOC (14-63%), and SO<sub>4</sub><sup>2-</sup> (13-30%), with the major contribution attributed to direct transport (Fig. S5d).

### 3.3 Response of nitrate to IPRs

Fig. S6 illustrates the spatial distributions of NO<sub>3</sub><sup>-</sup>/PM<sub>2.5</sub>, NO<sub>3</sub><sup>-</sup>/TNO<sub>3</sub>, the nitrogen oxidation ratios (NOR= [NO<sub>3</sub><sup>-</sup>]/([NO<sub>3</sub><sup>-</sup>] +[NO<sub>2</sub>])) and adjusted gas ratio (adjGR = ([NH<sub>3</sub>] + [NO<sub>3</sub><sup>-</sup>])/([HNO<sub>3</sub>] +[NO<sub>3</sub><sup>-</sup>])). NOR is used to reflect the conversion efficiency of NO<sub>2</sub> to NO<sub>3</sub><sup>-</sup>, and adjGR is used to determine the limiting factor of NO<sub>3</sub><sup>-</sup> formation (Huang et al., 2021a). When the value of adjGR is greater than zero, indicating that NO<sub>3</sub><sup>-</sup> is produced in HN<sub>3</sub>-rich regime.

In Fig. S7, vertical advection and diffusion (VTDA) processes act as mainly positive contributor to NO<sub>3</sub><sup>-</sup> production from 10:00 to 17:00 within model layers 1-8 (from the ground to 800m), while the IPR of the AERO process for NO<sub>3</sub><sup>-</sup> is negative. Whereas, the AERO process for NO<sub>3</sub><sup>-</sup> is positive at day, thus indicating that TNO<sub>3</sub> are partitioned into the particle phase and resulted in NO<sub>3</sub> accumulation upper layers 8.

In Fig. S8, the TNO<sub>3</sub> production rate through the OH+NO<sub>2</sub> pathway is dominant at model layer 1 and decreases with altitude at vertically layers. In Fig. S8 (a, b), the rates and contribution of the HET N<sub>2</sub>O<sub>5</sub> pathway is the largest in model layer 2-6 (residual layer, ~120-500 m) in winter of 2017 in Shanghai.

### 3.4 Production pathways of nitrate

In January, April, July and October 2017, the IRR analysis is used to elucidate the precise rates for TNO<sub>3</sub> formation and the relative contribution of three major TNO<sub>3</sub> pathways within the PBL under base, local and regional (sum of indirect and direct) transport simulations in Figs 6 and 7. Moreover, the seasonal and annual rates of the TNO<sub>3</sub> production pathways in five selected cities are illustrated in Table 4. Table 7 shows the comparison of the contribution of the major TNO<sub>3</sub> production pathways studies in the major Chinese regions. In addition, the average rates of the TNO<sub>3</sub> production pathways from the Local and Transport contributions in four seasons are illustrated in Tables S7 and S8.

Besides, OH+NO<sub>2</sub> pathway contribute significant to TNO<sub>3</sub> production in winter, accounting and 83%-88.4% at day in five YRD cities. Qin et al., (2021) has reported that the strong AOC in summer ( $4.5 \times 10^{-4} \text{ min}^{-1}$ ) is 7 times higher than the average value in winter ( $6.4 \times 10^{-5} \text{ min}^{-1}$ ) in YRD. Overall, local OH+NO<sub>2</sub> pathway strongly

dominates the  $\text{TNO}_3$  production rates and its diurnal variations at day, while indirect-transport HET  $\text{N}_2\text{O}_5$  pathway has a considerable contribution at night. Consistent with the results in Section 3.2, indirect transport act as the important contributor to  $\text{NO}_3^-$  formation in the four seasons, accounting for 24-37% in the entire YRD region. The analysis of  $\text{TNO}_3$  production pathways reveal the key precursors for  $\text{TNO}_3$  chemical production, mainly including the locally-emitted  $\text{NO}_2$ ,  $\text{NH}_3$  and  $\text{OH}$ , as well as the locally-emitted  $\text{NO}_2$  and transported  $\text{O}_3$  at night. Thus, the effective control strategies to modulate  $\text{NO}_3^-$  pollution should focus on reducing locally-emitted  $\text{OH}$  and transported- $\text{O}_3$ , besides enhancing control of  $\text{NH}_3$  and  $\text{NO}_x$  emission, especially in winter.

## Tables

**Table S1** WRF model configurations in this study

| WRF version 4.2               | Settings                        | Reference              |
|-------------------------------|---------------------------------|------------------------|
| Microphysics                  | New Thompson et al. scheme      | Thompson et al. (2008) |
| Radiation Longwave Radiation  | RRTM longwave scheme            | Iacono et al. (2008)   |
| Radiation Shortwave Radiation | RRTMG shortwave scheme          | Iacono et al. (2008)   |
| Surface Layer                 | Mellor-Yamada-Janjic similarity |                        |
| Land Surface                  | Noah Land Surface Model         |                        |
| Planetary Boundary layer      | Mellor-Yamada-Janjic scheme     | Janjić (1994)          |
| Cumulus Parameterization      | Modified Tiedtke scheme         | Zhang et al. (2011)    |
| Land Surface                  | Noah Land Surface Model         |                        |

**Table S2.** Physical and chemical processes considered in CMAQ v5.2 Integrated Process Rate (IPR).

| Processes ID | Name       | Descriptions                                                                                                     |
|--------------|------------|------------------------------------------------------------------------------------------------------------------|
| 1            | AERO       | Change due to aerosols processes, including condensation, coagulation, new particle formation and aerosol growth |
| 2            | CHEM       | Net sum of all gas-phase chemical processes for species                                                          |
| 3            | CLDS       | Change due to cloud processes, including aqueous reaction and removal by clouds and rain                         |
| 4            | Deposition | Sum of dry deposition                                                                                            |
| 5            | EMIS       | Emissions contribution to concentration                                                                          |
| 6            | HTRA       | Sum of horizontal advection and diffusion                                                                        |
| 7            | VTRA       | Sum of vertical advection and diffusion                                                                          |

Notes: DDEP = Deposition; TRAN = HTRA + VTRA. The IRR of PM<sub>2.5</sub> major components units ( $\mu\text{gm}^{-3} \text{h}^{-1}$ ), while the IRR of gas pollutants units (ppb h<sup>-1</sup>).

142 **Table S3.** TNO<sub>3</sub> production reactions considered in CMAQ v5.2 Integrated Reaction Rate (IRR).

| Reaction ID | Name                                             | Descriptions                                                                                                                                                                                                                                                                                              |
|-------------|--------------------------------------------------|-----------------------------------------------------------------------------------------------------------------------------------------------------------------------------------------------------------------------------------------------------------------------------------------------------------|
| 1           | OH + NO <sub>2</sub>                             | NO <sub>2</sub> + OH → HNO <sub>3</sub>                                                                                                                                                                                                                                                                   |
| 2           | HET NO <sub>2</sub>                              | NO <sub>2</sub> → 0.5*HONO + 0.5*HNO <sub>3</sub>                                                                                                                                                                                                                                                         |
| 3           | N <sub>2</sub> O <sub>5</sub> + H <sub>2</sub> O | N <sub>2</sub> O <sub>5</sub> + H <sub>2</sub> O → 2*HNO <sub>3</sub>                                                                                                                                                                                                                                     |
| 4           | HET N <sub>2</sub> O <sub>5</sub>                | i. N <sub>2</sub> O <sub>5</sub> → HNO <sub>3</sub> + H <sub>2</sub> NO <sub>3</sub> PIJ; ii. N <sub>2</sub> O <sub>5</sub> → HNO <sub>3</sub> + H <sub>2</sub> NO <sub>3</sub> PK; iii. H <sub>2</sub> NO <sub>3</sub> PIJ → HNO <sub>3</sub> ; iv. H <sub>2</sub> NO <sub>3</sub> PK → HNO <sub>3</sub> |
| 5           | NO <sub>3</sub> + HO <sub>2</sub>                | NO <sub>3</sub> + HO <sub>2</sub> → 0.8*OH + 0.8*NO <sub>2</sub> + 0.2*HNO <sub>3</sub>                                                                                                                                                                                                                   |
| 6           | NO <sub>3</sub> + Org                            | (HCHO+CCHO+RCHO+GLY+MGLY+CRES+BALD+IPRD+HOCCHO+ACROLE+MACR+NIT1)<br>+ NO <sub>3</sub> → HNO <sub>3</sub>                                                                                                                                                                                                  |
| 7           | HET_NO <sub>3</sub>                              | NO <sub>3</sub> → HNO <sub>3</sub>                                                                                                                                                                                                                                                                        |
| 8           | HNO <sub>3</sub> fromHydroly                     | i. AMTNO <sub>3</sub> J → HNO <sub>3</sub> + 1.00*AMTHYDJ; ii. AISOPNNJ → 2.0*HNO <sub>3</sub> + 0.5*AMTHYDJ                                                                                                                                                                                              |

143 Notes: Three major TNO<sub>3</sub> production pathways selected were OH+NO<sub>2</sub>, HET N<sub>2</sub>O<sub>5</sub>, and Others. Others represent the sum of reaction 2, 3, 5, 6, 7 and 8 in this study.

144 IRRs unit (ppb/h). Conceptual TNO<sub>3</sub> chemical reactions pathways can be clearly discussed in Section S1.1.

**Table S4.** The mean bias (MB), normalized mean bias (NMB), normalized mean error (NME), correlation coefficient (R), root mean square error (RMSE) and index of agreement (IOA) were applied to estimate the performance of the model in this study.

| Statistical metrics / abbreviation                                                                                                                 | Note                       | Benchmarks         |
|----------------------------------------------------------------------------------------------------------------------------------------------------|----------------------------|--------------------|
| $MB = \frac{1}{N} \sum_{i=1}^N (M_i - O_i)$                                                                                                        | Concentration unit         |                    |
| $NMB = \frac{1}{N} \sum_{i=1}^N \left( \frac{M_i - O_i}{M_i + O_i} \right)$                                                                        | $-1 \leq NMB \leq +\infty$ | $NMB \leq \pm 0.6$ |
| $NME = \frac{1}{N} \sum_{i=1}^N \left  \frac{M_i - O_i}{M_i + O_i} \right $                                                                        | $0 \leq NME \leq +\infty$  | $NME \leq 0.75$    |
| $R = \frac{\sum_{i=1}^N (M_i - \bar{M}) \cdot (O_i - \bar{O})}{\sqrt{\sum_{i=1}^N (M_i - \bar{M})^2} \cdot \sqrt{\sum_{i=1}^N (O_i - \bar{O})^2}}$ | $-1 \leq R \leq 1$         | $R \geq 0.7$       |
| $RMSE = \sqrt{\sum_{i=1}^N \frac{(M_i - O_i)^2}{N}}$                                                                                               | Concentration unit         | $RMSE \leq 2.0$    |
| $IOA = 1 - \frac{\sum_{i=1}^N (M_i - O_i)^2}{\sum_{i=1}^N ( M_i - M_{\text{mean}}  +  O_i - O_{\text{mean}} )^2}$                                  | $0 < IOA \leq 1$           | $IOA \geq 0.7$     |

Note:  $M_i$  and  $O_i$  represent the concentration from modeling simulation and observation, respectively.  $N$  is the number of days. The benchmarks of WRF-CMAQ were suggested by Huang et al. (2021), Emery et al. (2017) and Emery et al. (2001).

**Table S5.** The average  $\text{NO}_3^-$  ( $\text{HNO}_3$ ) concentrations for the enter YRD region under four scenarios during the modeling period.  $\text{NO}_3^-$  ( $\text{HNO}_3$ ) units  $\mu\text{g m}^{-3}$  (ppb).

| Scenarios    | January       | April        | July         | October      | Annual       |
|--------------|---------------|--------------|--------------|--------------|--------------|
| Base         | 15.95 ( 0.09) | 7.38 ( 1.04) | 0.95 ( 1.37) | 5.43 ( 0.55) | 7.43 ( 0.76) |
| YRD-zero     | 4.06 ( 0.62)  | 0.45 ( 0.65) | 0.07 ( 0.34) | 0.63 ( 0.36) | 1.31 ( 0.49) |
| Outside-zero | 8.05 ( 0.06)  | 4.58 ( 0.69) | 0.55 ( 1.03) | 3.15 ( 0.42) | 4.08 ( 0.55) |
| All-zero     | 0.02 ( 0.03)  | 0.01 ( 0.05) | 0.01 ( 0.05) | 0.03 ( 0.01) | 0.03 ( 0.02) |

155 **Table S6.** The average rates of the important TNO<sub>3</sub> production pathways during the daytime  
156 and nighttime in four seasons of 2017 in Shanghai.

| Production                        | January |      |       | April |      |       | July  |      |       | October |      |       |
|-----------------------------------|---------|------|-------|-------|------|-------|-------|------|-------|---------|------|-------|
| Rates (ppb/h)                     | Daily   | Day  | Night | Daily | Day  | Night | Daily | Day  | Night | Daily   | Day  | Night |
| TNO <sub>3</sub>                  | 0.31    | 0.40 | 0.22  | 0.65  | 0.93 | 0.37  | 1.09  | 1.65 | 0.53  | 0.28    | 0.44 | 0.12  |
| OH + NO <sub>2</sub>              | 0.22    | 0.36 | 0.08  | 0.53  | 0.91 | 0.16  | 0.90  | 1.61 | 0.19  | 0.24    | 0.42 | 0.06  |
| HET N <sub>2</sub> O <sub>5</sub> | 0.09    | 0.04 | 0.14  | 0.10  | 0.01 | 0.19  | 0.12  | 0.01 | 0.26  | 0.03    | 0.01 | 0.05  |

157

158 **Table S7.** The average rates of the important TNO<sub>3</sub> production pathways during the daytime  
159 and nighttime in January, April, July and October 2017 under the Local contribution.

| Production                        | January |      |       | April |      |       | July  |      |       | October |      |       |
|-----------------------------------|---------|------|-------|-------|------|-------|-------|------|-------|---------|------|-------|
| Rates (ppb/h)                     | Daily   | Day  | Night | Daily | Day  | Night | Daily | Day  | Night | Daily   | Day  | Night |
| TNO <sub>3</sub>                  | 0.27    | 0.37 | 0.16  | 0.56  | 0.85 | 0.28  | 1.00  | 1.60 | 0.50  | 0.26    | 0.41 | 0.11  |
| OH + NO <sub>2</sub>              | 0.20    | 0.33 | 0.07  | 0.49  | 0.83 | 0.14  | 0.89  | 1.55 | 0.24  | 0.23    | 0.40 | 0.06  |
| HET N <sub>2</sub> O <sub>5</sub> | 0.07    | 0.03 | 0.09  | 0.07  | 0.02 | 0.11  | 0.11  | 0.02 | 0.20  | 0.03    | 0.01 | 0.04  |

160

161 **Table S8.** The average rates of the important TNO<sub>3</sub> production pathways during the daytime  
162 and nighttime in January, April, July and October 2017 under the Transport contribution.

| Production                        | January |      |       | April |      |       | July  |       |       | October |       |       |
|-----------------------------------|---------|------|-------|-------|------|-------|-------|-------|-------|---------|-------|-------|
| Rates (ppb/h)                     | Daily   | Day  | Night | Daily | Day  | Night | Daily | Day   | Night | Daily   | Day   | Night |
| TNO <sub>3</sub>                  | 0.04    | 0.04 | 0.04  | 0.08  | 0.07 | 0.09  | 0.03  | 0.02  | 0.05  | 0.02    | 0.02  | 0.01  |
| OH NO <sub>2</sub>                | 0.02    | 0.03 | 0.01  | 0.04  | 0.06 | 0.02  | 0.01  | 0.01  | 0.03  | 0.01    | 0.018 | 0.002 |
| HET N <sub>2</sub> O <sub>5</sub> | 0.02    | 0.01 | 0.03  | 0.04  | 0.01 | 0.06  | 0.02  | 0.003 | 0.04  | 0.01    | 0.002 | 0.01  |

163

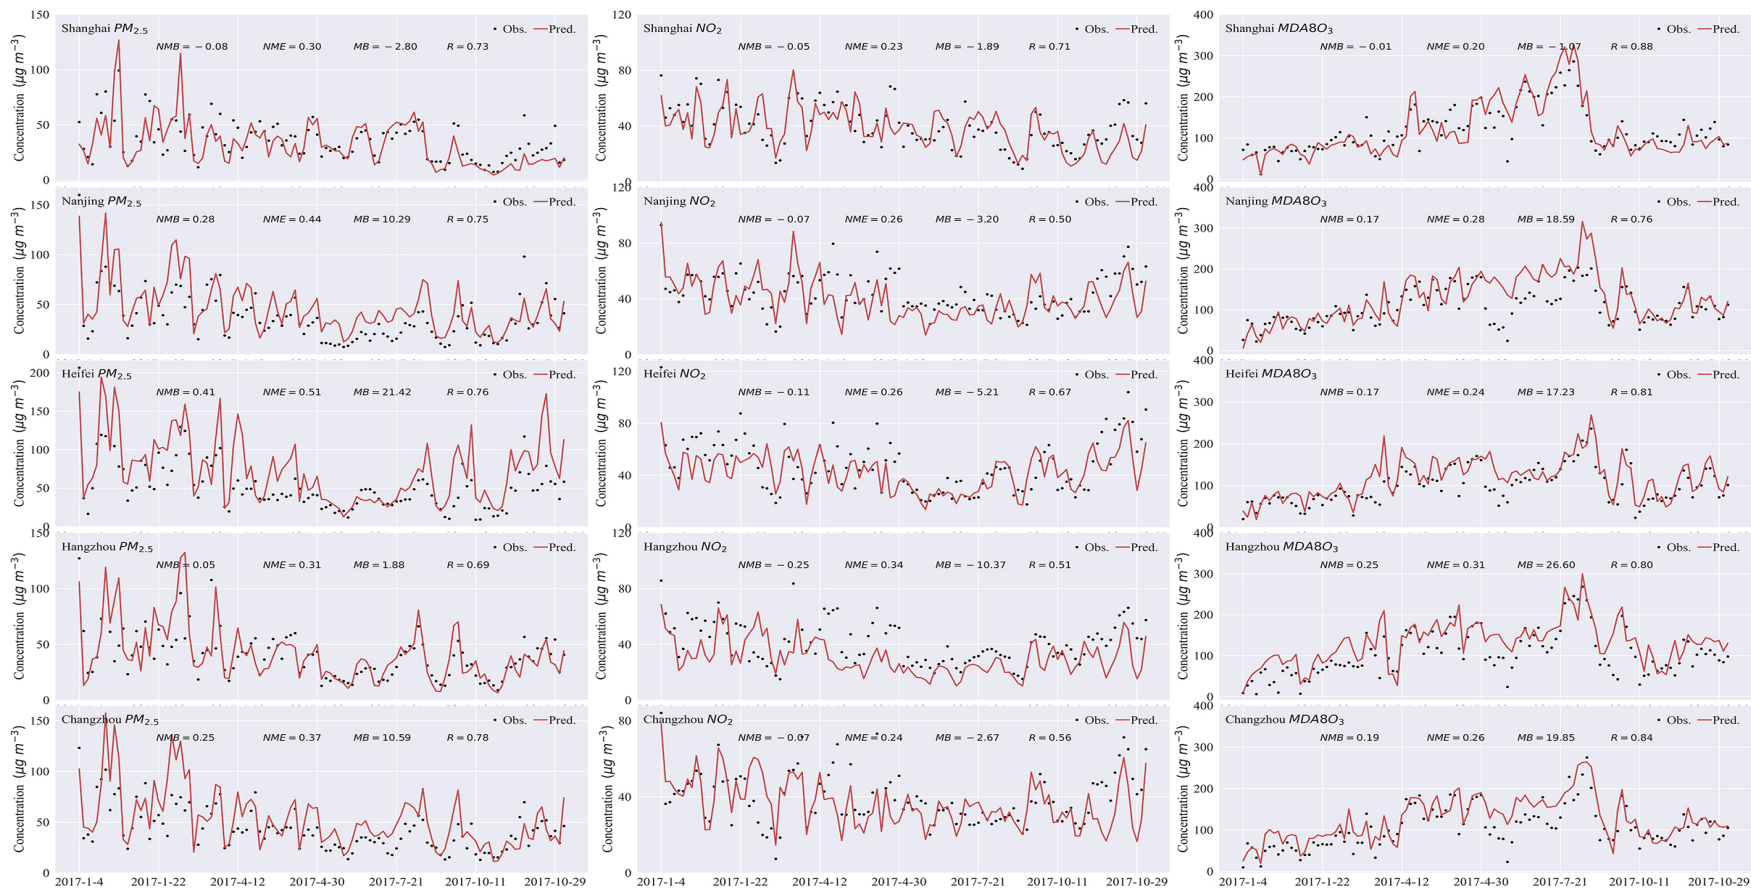

165  
166 **Fig. S1.** Daily time series of prediction (red) and observation (black)  $PM_{2.5}$ ,  $NO_2$ ,  $O_3$  concentrations for the full year of 2017 in five selected

167 cities.

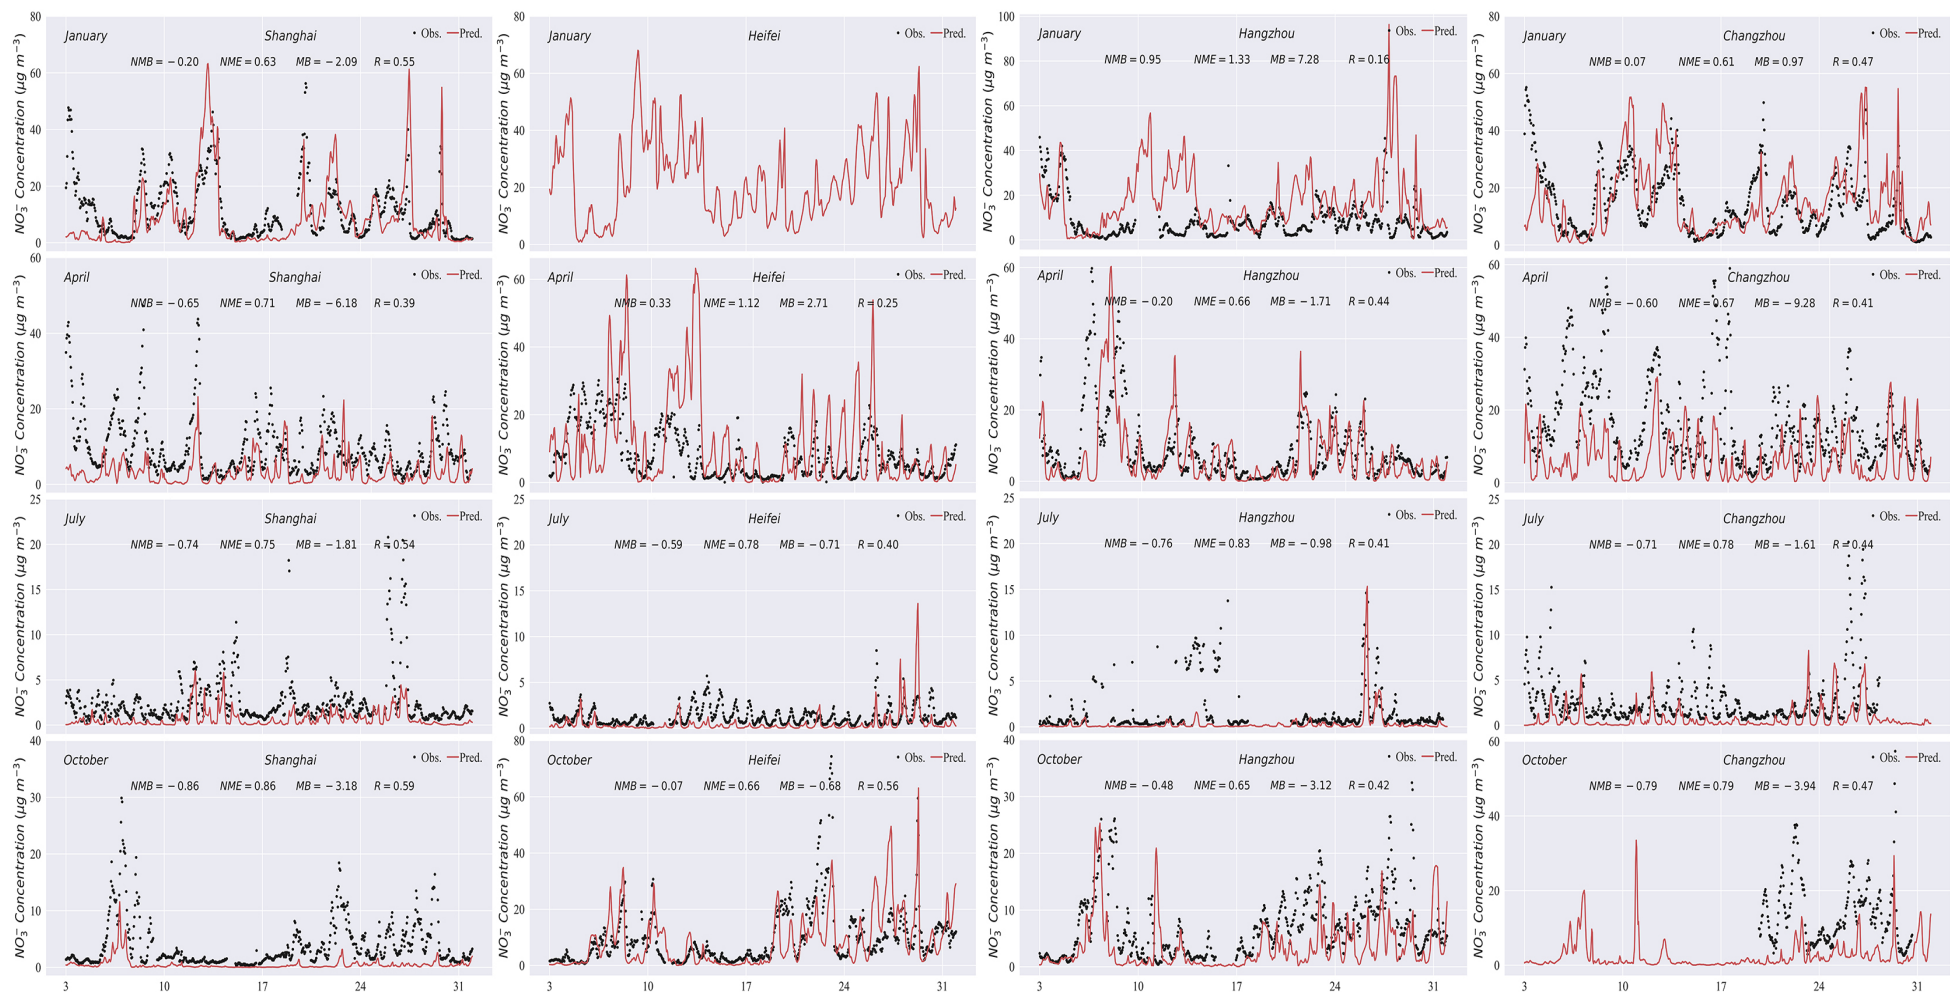

**Fig. S2.** Hourly time series of prediction (red) and observation (black)  $\text{NO}_3^-$  concentrations in January, April, July, and October 2017 in four cities.

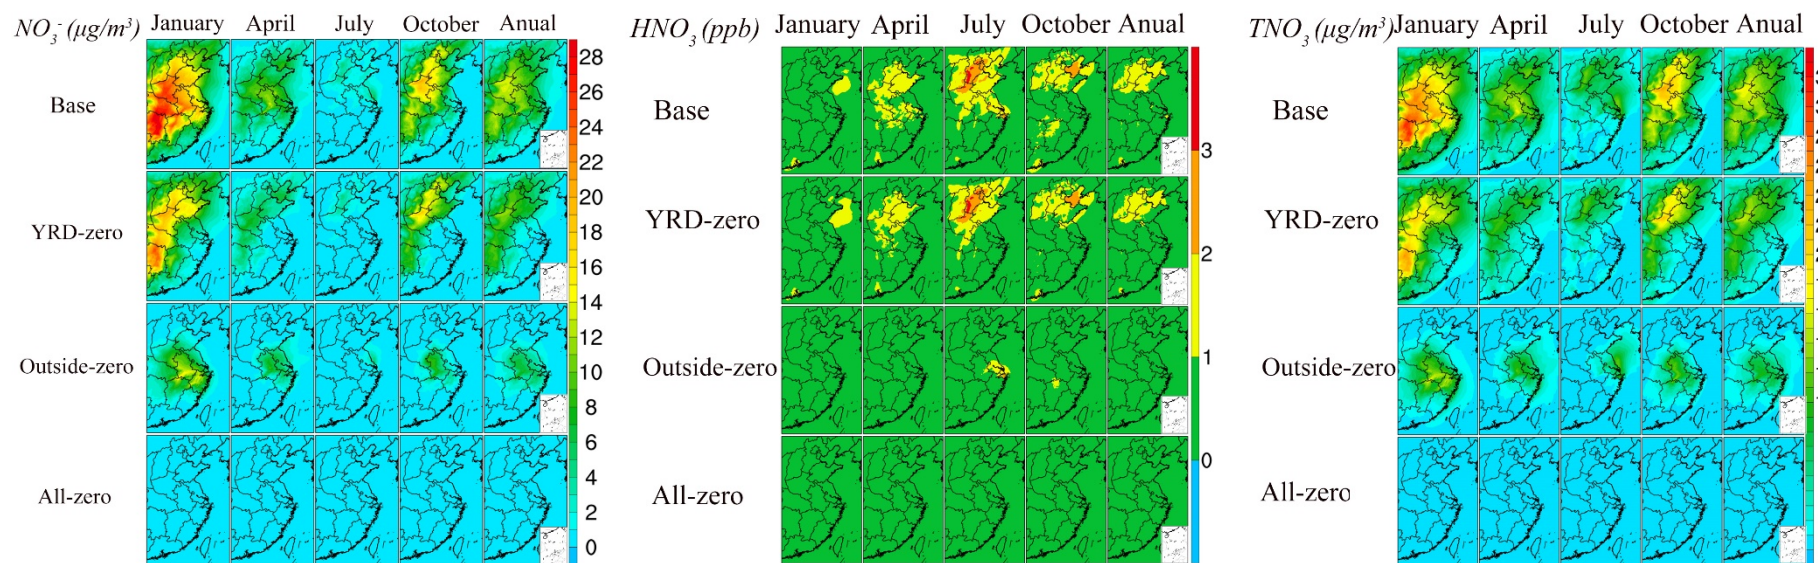

**Fig. S3.** Spatial distributions of four typical months and annual mean  $NO_3^-$ ,  $HNO_3$  and  $TNO_3$  concentrations under four emissions scenarios.

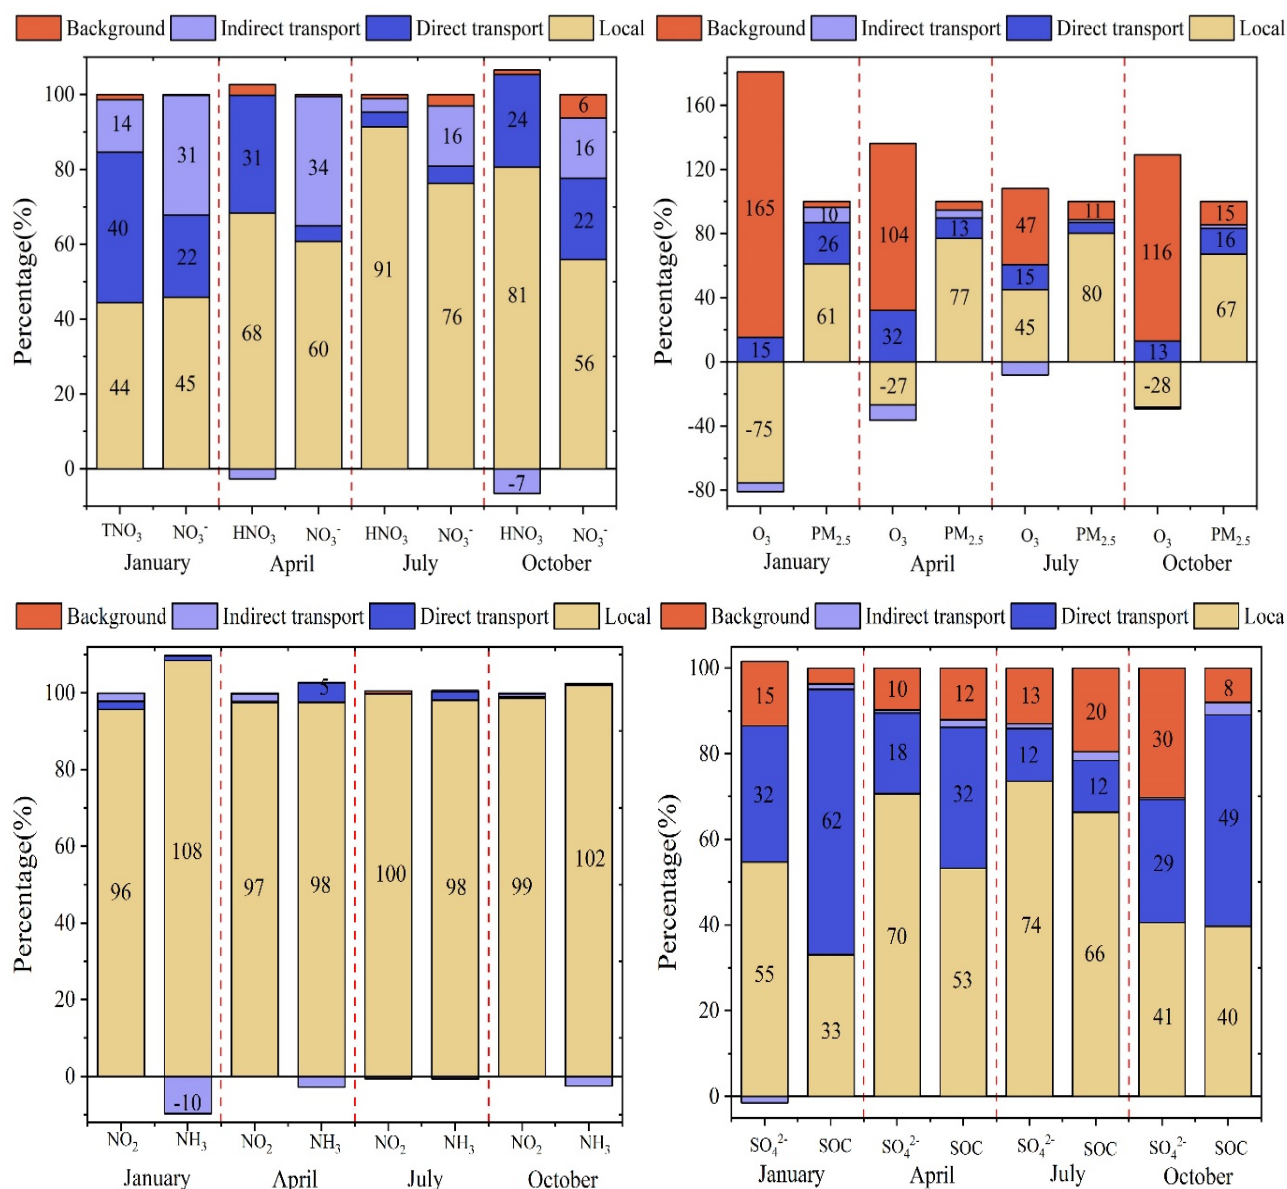

**Fig. S4.** The contributions of Background, Local, Indirect and Direct transport to Nitrate-related species (ie, NO<sub>3</sub><sup>-</sup>, HNO<sub>3</sub>, PM<sub>2.5</sub>, O<sub>3</sub>, NO<sub>2</sub>, NH<sub>3</sub>, SO<sub>4</sub><sup>2-</sup> and SOC) in January, April, July and October 2017 in Shanghai.

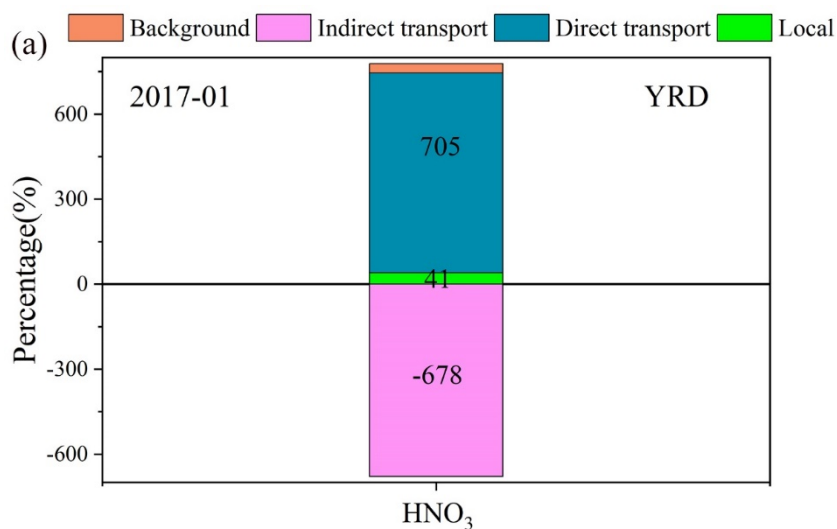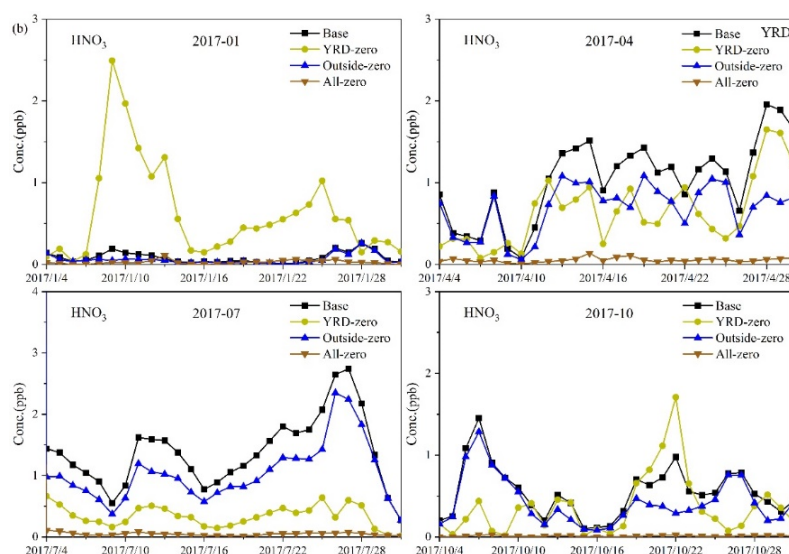

**Fig. S5.** (a). The contributions of Background, Local, Indirect and Direct transport to  $\text{HNO}_3$  in January 2017 for the enter YRD; (b). The concentrations of  $\text{HNO}_3$  concentrations during the simulation period under four scenarios for the enter YRD.

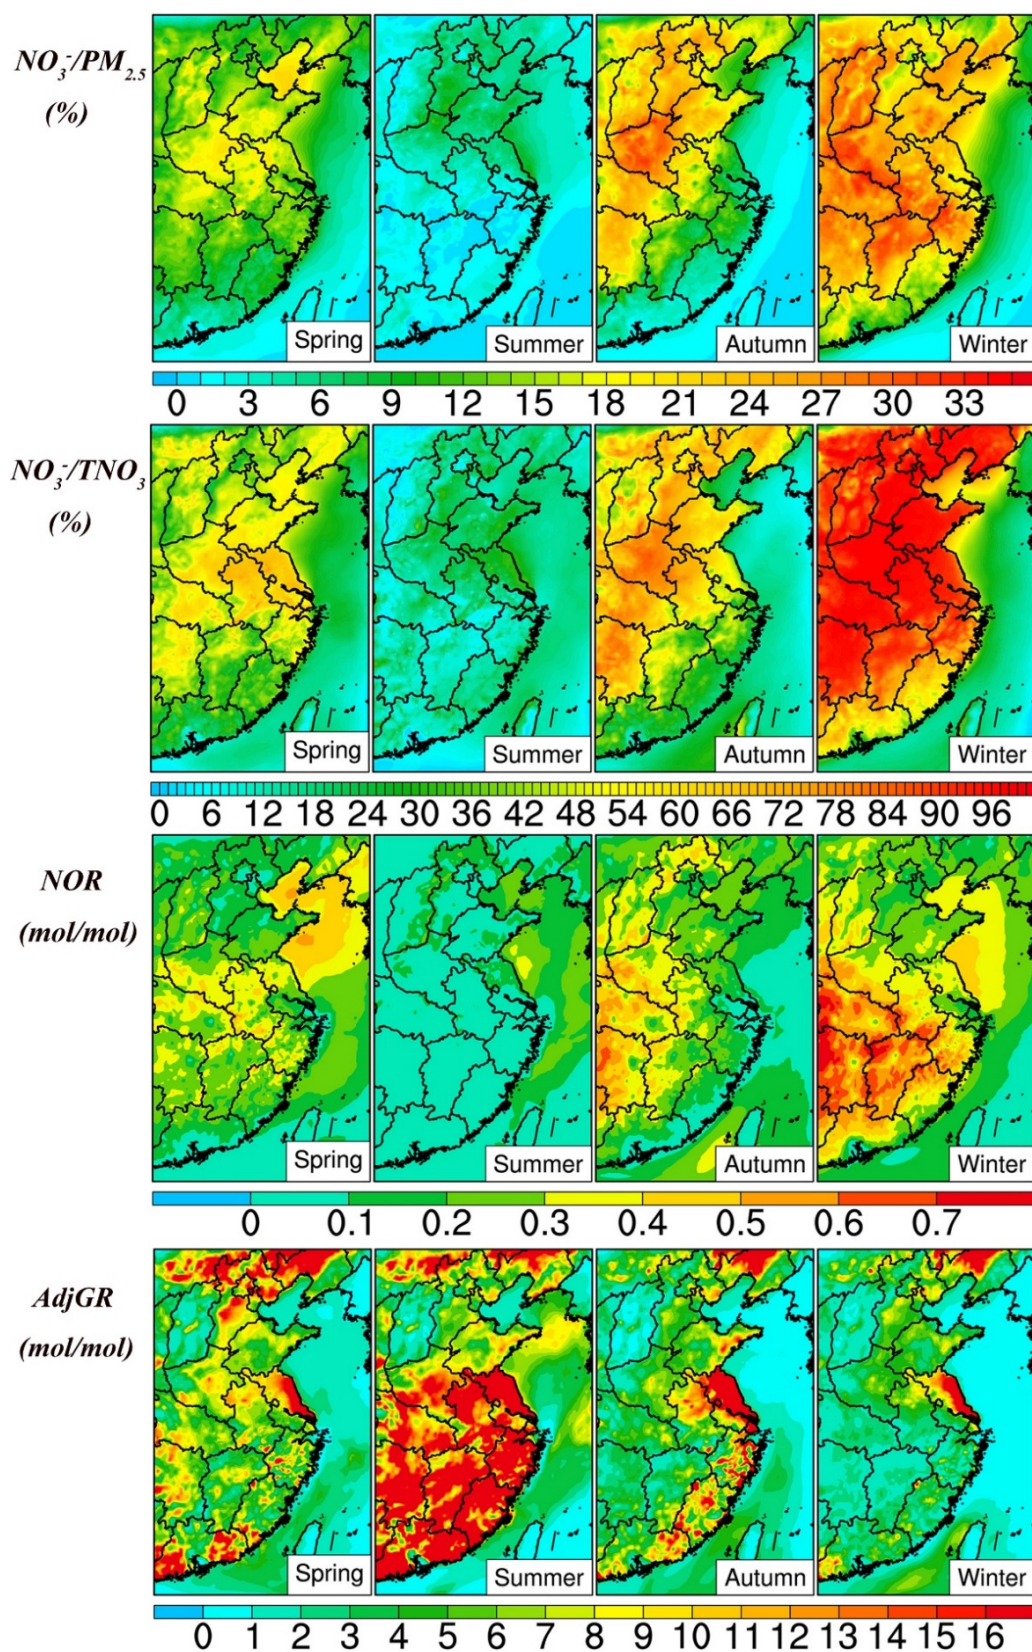

**Fig. S6.** Spatial distributions of four typical seasons of  $NO_3^-/PM_{2.5}$ ,  $NO_3^-/TNO_3$ , NOR and AdjGR under base scenario.

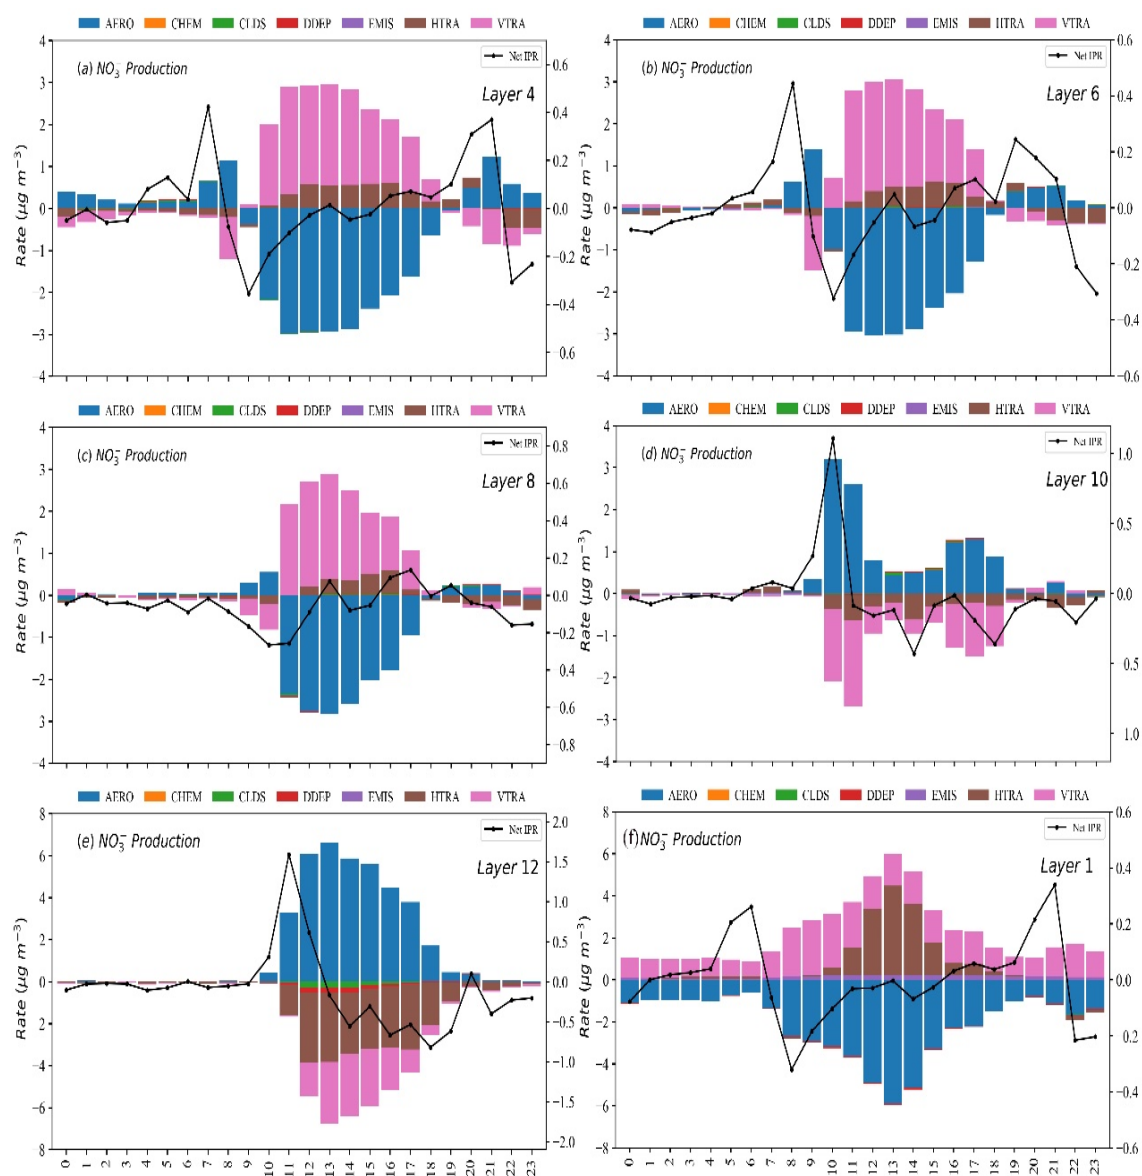

**Fig. S7.** Vertical layers (Layer 1, 4, 6, 8, 10 and 12) physical and chemical processes rates  $\text{NO}_3^-$  in July 2017. The black line represents the net IPR value in each hour of day.

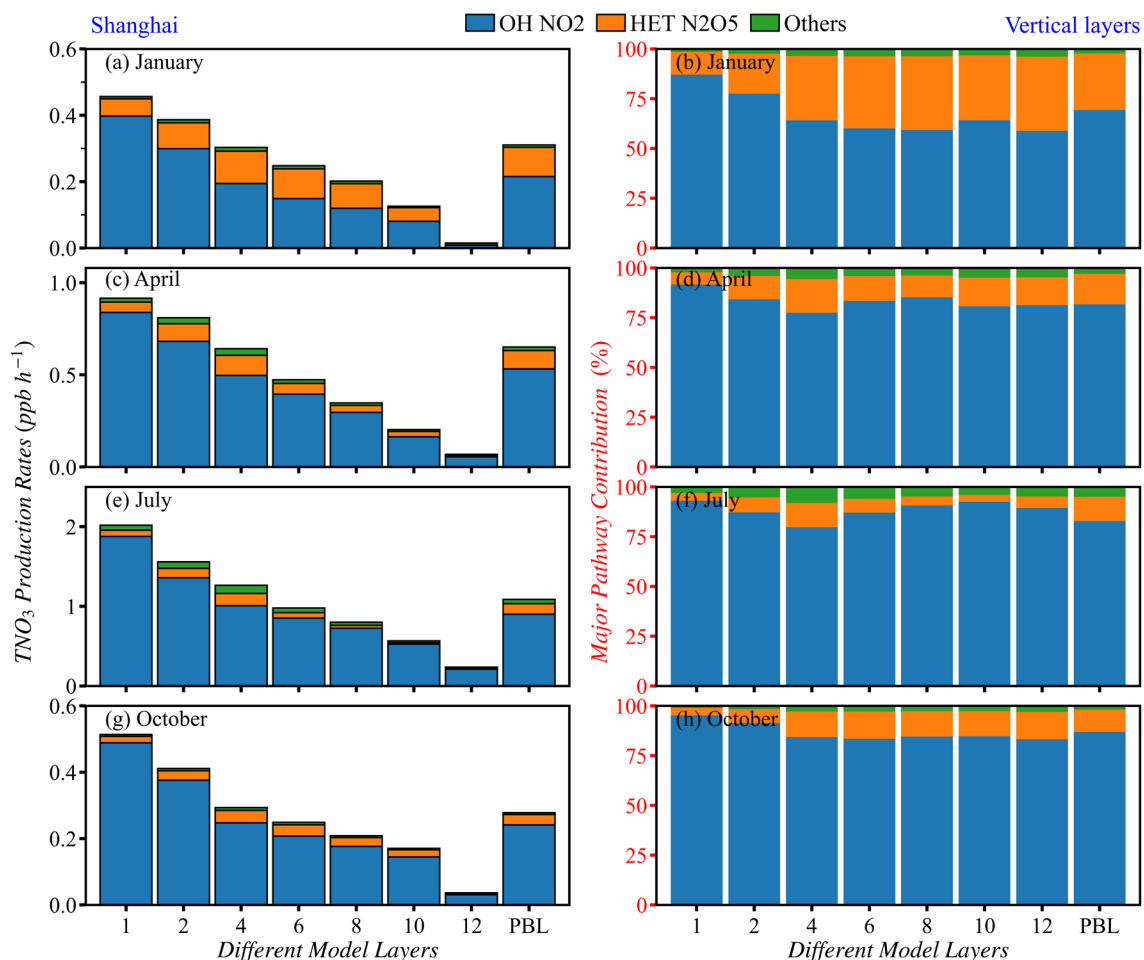

**Fig. S8.** Comparison of TNO<sub>3</sub> production rates (a, c, e, g) and contributions (b, d, f, h) of three major pathways between vertical layers (Layer 1, 4, 6, 8, 10 and 12, corresponding to the height ranging from 32 to 80 m, 80 to 160 m, 250 to 320 m, 420 to 500 m, 580 to 760 m, 1000 to 1300 m, and 2000 to 2800 m, respectively) and PBL.

## References

- Hu, J., Chen, J., Ying, Q., Zhang, H., 2016. One-year simulation of ozone and particulate matter in China using WRF/CMAQ modeling system. *Atmos. Chem. Phys.* 16, 10333-10350.
- Liu, T., Wang, X.Y., Hu, J.L., Wang, Q., An, J., Gong, K., Sun, J., Li, L., Qin, M., Li, J., Tian, J., Huang, Y., Liao, H., Zhou, M., Hu, Q., Yan, R., Wang, H., Huang, C., 2020. Driving Forces of Changes in Air Quality during the COVID-19 Lockdown Period in the Yangtze River Delta Region, China. *Environ. Sci. Technol. Lett.* 7, 779-786.
- Wang, X., Li, L., Gong, K., Mao, J., Hu, J., Li, J., Liu, Z., Liao, H., Qiu, W., Yu, Y., Dong, H., Guo, S., Hu, M., Zeng, L., Zhang, Y., 2021. Modelling air quality during the EXPLORE-YRD campaign – Part I. Model performance evaluation and impacts of meteorological inputs and grid resolutions. *Atmos. Environ.* 246, 118131.
- Huang, L., Zhu, Y., Zhai, H., Xue, S., Zhu, T., Shao, Y., Liu, Z., Emery, C., Yarwood, G., Wang, Y., Fu, J., Zhang, K., Li, L., 2021. Recommendations on benchmarks for numerical air quality model applications in China – Part 1: PM<sub>2.5</sub> and chemical species. *Atmos. Chem. Phys.* 21, 2725-2743
- Emery, C., Liu, Z., Russell, A.G., Odman, M.T., Yarwood, G., Kumar, N., 2017. Recommendations on statistics and benchmarks to assess photochemical model performance. *J. Air Waste Manage. Assoc.* 67, 582-598.
- Emery, C., Tai, E., Yarwood, G., 2001. Enhanced Meteorological Modeling and Performance Evaluation for Two Texas Ozone Episodes, Prepared for the Texas Natural Resource Conservation Commission. Environ International Corporation, Novato, CA.
- Qin, M., Hu, A., Mao, J., Li, X., Sheng, L., Sun, J., Li, J., Wang, X., Zhang, Y., and Hu, J.: PM<sub>2.5</sub> and O<sub>3</sub> relationships affected by the atmospheric oxidizing capacity in the Yangtze River Delta, China, *Sci. Total Environ.*, 152268, <https://doi.org/10.1016/j.scitotenv.2021.152268>, 2021.
- Huang, L., Sun, J. J., Jin, L., Brown, N. J., and Hu, J.: Strategies to reduce PM<sub>2.5</sub> and O<sub>3</sub> together during late summer and early fall in San Joaquin Valley, California, *Atmos. Res.*, 258, 105633, <https://doi.org/10.1016/j.atmosres.2021.105633>, 2021a.
- Iacono, M.J., Delamere, J.S., Mlawer, E.J., Shephard, M.W., Clough, S.A., Collins, W.D., 2008. Radiative forcing by long-lived greenhouse gases: Calculations with the AER radiative transfer models. *Journal of Geophysical Research: Atmospheres* 113.
- Janjić, Z.I., 1994. The Step-Mountain Eta Coordinate Model: Further Developments of the Convection, Viscous Sublayer, and Turbulence Closure Schemes. *MWRv* 122, 927-945.
- Thompson, G., Field, P.R., Rasmussen, R.M., Hall, W.D., 2008. Explicit Forecasts of Winter Precipitation Using an Improved Bulk Microphysics Scheme. Part II: Implementation of a New Snow Parameterization. *MWRv* 136, 5095-5115.
- Zhang, C., Wang, Y., Hamilton, K., 2011. Improved Representation of Boundary Layer Clouds over the Southeast Pacific in ARW-WRF Using a Modified Tiedtke Cumulus Parameterization Scheme. *MWRv* 139, 3489-3513.
